# Supplementary material
Source: PubMed Central journal article supplement (PMC4381540)
Supplement: NIHMS619116-supplement-supplementary_data.pdf [file NIHMS619116-supplement-supplementary_data.pdf]

## Appendix 1: Supporting online material

### References included in the meta-analysis

- Bherer, L., Kramer, A.F., Peterson, M.S., Colcombe, S., Erickson, K., & Bécic, E. (2005). Training effects on dual-task performance: Are there age-related differences in plasticity of attentional control?. *Psychology and aging, 20*(4), 695.
- Bherer, L., Kramer, A.F., Peterson, M.S., Colcombe, S., Erickson, K., & Bécic, E. (2006). Testing the limits of cognitive plasticity in older adults: application to attentional control. *Acta Psychologica, 123*(3), 261-278.
- Bherer, L., Kramer, A.F., Peterson, M.S., Colcombe, S., Erickson, K., & Bécic, E. (2008). Transfer effects in task-set cost and dual-task cost after dual-task training in older and younger adults: further evidence for cognitive plasticity in attentional control in late adulthood. *Experimental aging research, 34*(3), 188-219.
- Borella, E., Carretti, B., Riboldi, F., & De Beni, R. (2010). Working memory training in older adults: evidence of transfer and maintenance effects. *Psychology and aging, 25*(4), 767.
- Borella, E., Carretti, B., Zannoni, G., Zavagnin, M., & De Beni, R. (2013). Working Memory Training in Old Age: An Examination of Transfer and Maintenance Effects. *Archives of Clinical Neuropsychology, 28*(4), 331-347.
- Brehmer, Y., Rieckmann, A., Bellander, M., Westerberg, H., Fischer, H., & Bäckman, L. (2011). Neural correlates of training-related working-memory gains in old age. *Neuroimage, 58*(4), 1110-1120.
- Brehmer, Y., Westerberg, H., & Bäckman, L. (2012). Working-memory training in younger and older adults: training gains, transfer, and maintenance. *Frontiers in human neuroscience, 6*.

- Buchler, N.G., Hoyer, W.J., & Cerella, J. (2008). Rules and more rules: the effects of multiple tasks, extensive training, and aging on task-switching performance. *Memory & cognition*, 36(4), 735-748.
- Buschkuhl, M., Jaeggi, S.M., Hutchison, S., Perrig-Chiello, P., Däpp, C., Müller, M., ... & Perrig, W.J. (2008). Impact of working memory training on memory performance in old-old adults. *Psychology and aging*, 23(4), 743.
- Carretti, B., Borella, E., Zavagnin, M., & Beni, R. (2012). Gains in language comprehension relating to working memory training in healthy older adults. *International journal of geriatric psychiatry*.
- Cassavaugh, N.D., & Kramer, A.F. (2009). Transfer of computer-based training to simulated driving in older adults. *Applied ergonomics*, 40(5), 943-952.
- Cepeda, N.J., Kramer, A.F., & Gonzalez de Sather, J. (2001). Changes in executive control across the life span: examination of task-switching performance. *Developmental psychology*, 37(5), 715.
- Dahlin, E., Neely, A.S., Larsson, A., Bäckman, L., & Nyberg, L. (2008). Transfer of learning after updating training mediated by the striatum. *Science*, 320(5882), 1510-1512.
- Dahlin, E., Nyberg, L., Bäckman, L., & Neely, A.S. (2008). Plasticity of executive functioning in young and older adults: immediate training gains, transfer, and long-term maintenance. *Psychology and aging*, 23(4), 720.
- Davidson, D.J., Zacks, R.T., & Williams, C.C. (2003). Stroop interference, practice, and aging. *Aging, Neuropsychology, and Cognition*, 10(2), 85-98.
- Dorbath, L., Hasselhorn, M., & Titz, C. (2011). Aging and executive functioning: a training study on focus-switching. *Frontiers in psychology*, 2.

- Dotson, V.M., Sozda, C.N., Marsiske, M., & Perlstein, W.M. (2012). Within-session practice eliminates age differences in cognitive control. *Aging, Neuropsychology, and Cognition*, 1-10.
- Dulaney, C.L., & Rogers, W.A. (1994). Mechanisms underlying reduction in Stroop interference with practice for young and old adults. *Journal of Experimental Psychology: Learning, Memory, and Cognition*, 20(2), 470.
- Erickson, K.I., Colcombe, S.J., Wadhwa, R., Bherer, L., Peterson, M.S., Scalf, P.E., ... & Kramer, A.F. (2007). Training-induced plasticity in older adults: effects of training on hemispheric asymmetry. *Neurobiology of aging*, 28(2), 272-283.
- Göthe, K., Oberauer, K., & Kliegl, R. (2007). Age differences in dual-task performance after practice. *Psychology and Aging*, 22(3), 596.
- Heinzel, S., Schulte, S., Onken, J., Duong, Q.L., Riemer, T.G., Heinz, A., ... & Rapp, M.A. (2013). Working memory training improvements and gains in non-trained cognitive tasks in young and older adults. *Aging, Neuropsychology, and Cognition*, (ahead-of-print), 1-28.
- Karbach, J., & Kray, J. (2009). How useful is executive control training? Age differences in near and far transfer of task-switching training. *Developmental science*, 12(6), 978-990.
- Karbach, J., Mang, S., & Kray, J. (2010). Transfer of task-switching training in older age: The role of verbal processes. *Psychology and aging*, 25(3), 677.
- Kramer, A.F., Hahn, S., & Gopher, D. (1999). Task coordination and aging: Explorations of executive control processes in the task switching paradigm. *Acta psychologica*, 101(2), 339-378.
- Kramer, A.F., Larish, J.F., & Strayer, D.L. (1995). Training for attentional control in dual task settings: A comparison of young and old adults. *Journal of Experimental Psychology: Applied*, 1(1), 50.

- Kray, J., Eber, J., & Karbach, J. (2008). Verbal self-instructions in task switching: a compensatory tool for action-control deficits in childhood and old age?. *Developmental Science, 11*(2), 223-236.
- Kray, J., & Eppinger, B. (2006). Effects of associative learning on age differences in task-set switching. *Acta Psychologica, 123*(3), 187-203.
- Kray, J., & Lindenberger, U. (2000). Adult age differences in task switching. *Psychology and aging, 15*(1), 126.
- Li, K.Z., Roudaia, E., Lussier, M., Bherer, L., Leroux, A., & McKinley, P.A. (2010). Benefits of cognitive dual-task training on balance performance in healthy older adults. *The Journals of Gerontology Series A: Biological Sciences and Medical Sciences, 65*(12), 1344-1352.
- Lussier, M., Gagnon, C., & Bherer, L. (2012). An investigation of response and stimulus modality transfer effects after dual-task training in younger and older. *Frontiers in human neuroscience, 6*.
- Mahncke, H.W., Connor, B.B., Appelman, J., Ahsanuddin, O.N., Hardy, J.L., Wood, R.A., ... & Merzenich, M.M. (2006). Memory enhancement in healthy older adults using a brain plasticity-based training program: a randomized, controlled study. *Proceedings of the National Academy of Sciences, 103*(33), 12523-12528.
- MacKay-Brandt, A. (2011). Training attentional control in older adults. *Aging, Neuropsychology, and Cognition, 18*(4), 432-451.
- Mozolic, J.L., Long, A.B., Morgan, A.R., Rawley-Payne, M., & Laurienti, P.J. (2011). A cognitive training intervention improves modality-specific attention in a randomized controlled trial of healthy older adults. *Neurobiology of aging, 32*(4), 655-668.
- Osaka, M., Yaoi, K., Otsuka, Y., Katsuhara, M., & Osaka, N. (2012). Practice on conflict tasks

- promotes executive function of working memory in the elderly. *Behavioural Brain Research*, 233(1), 90-98.
- Richmond, L.L., Morrison, A.B., Chein, J.M., & Olson, I.R. (2011). Working memory training and transfer in older adults. *Psychology and aging*, 26(4), 813.
- Rockstroh, S., Dietrich, B., & Pokorny, R. (1995). Memory and attention test performance of young and elderly subjects after retest practice. *International Psychogeriatrics*, 7(3), 377-384.
- Shing, Y. L., Schmiedek, F., Lövdén, M., & Lindenberger, U. (2012). Memory updating practice across 100 days in the COGITO study. *Psychology and aging*, 27(2), 451.
- Stepankova, H., Lukavsky, J., Buschkuehl, M., Kopecek, M., Ripova, D., & Jaeggi, S. M. (2013). The malleability of working memory and visuospatial skills: A randomized controlled study in older adults. *Developmental Psychology*. Advance online publication.
- Stern, Y., Blumen, H.M., Rich, L.W., Richards, A., Herzberg, G., & Gopher, D. (2011). Space Fortress game training and executive function in older adults: A pilot intervention. *Aging, Neuropsychology, and Cognition*, 18(6), 653-677.
- Strobach, T., Frensch, P., Müller, H., & Schubert, T. (2012). Age-and practice-related influences on dual-task costs and compensation mechanisms under optimal conditions of dual-task performance. *Aging, Neuropsychology, and Cognition*, 19(1-2), 222-247.
- Strobach, T., Frensch, P., Müller, H.J., & Schubert, T. (2012). Testing the limits of optimizing dual-task performance in younger and older adults. *Frontiers in human neuroscience*, 6.
- Sutter, C., Zöllig, J., & Martin, M. (2012). Plasticity of Verbal Fluency in Older Adults: A 90-Minute Telephone-Based Intervention. *Gerontology*, 59(1), 53-63.
- Tomprowski, P.D. (2003). Performance and perceptions of workload among young and older adults: Effects of practice during cognitively demanding tasks. *Educational Gerontology*,

29(5), 447-466.

von Bastian, C.C., Langer, N., Jäncke, L., & Oberauer, K. (2012). Effects of working memory training in young and old adults. *Memory & cognition*, 1-14.

Wang, M.Y., Chang, C.Y., & Su, S.Y. (2011). What's cooking?—Cognitive training of executive function in the elderly. *Frontiers in psychology*, 2.

Wilkinson, A.J., & Yang, L. (2012). Plasticity of inhibition in older adults: Retest practice and transfer effects. *Psychology and aging*, 27(3), 606.

Willis, S.L., Cornelius, S.W., Blow, F.C., & Baltes, P.B. (1983). Training research in aging: Attentional processes. *Journal of Educational Psychology*, 75(2), 257.

Zinke, K., Zeintl, M., Eschen, A., Herzog, C., & Kliegel, M. (2011). Potentials and limits of plasticity induced by working memory training in old-old age. *Gerontology*, 58(1), 79-87.

Zinke, K., Zeintl, M., Rose, N.S., Putzmann, J., Pydde, A., & Kliegel, M. (2014). Working Memory Training and Transfer in Older Adults: Effects of Age, Baseline Performance, and Training Gains. *Developmental Psychology*, 50(1), 304-315.

## Appendix 2: Supporting online material

Table: Effect sizes and homogeneity statistics for selected groupings of the data.

|                                                                         | k (number of studies) | Effect size | LL 95% CI | UL 95% CI | Q <sub>w</sub> |
|-------------------------------------------------------------------------|-----------------------|-------------|-----------|-----------|----------------|
| Pre to Post gain effects                                                |                       |             |           |           |                |
| By treatment                                                            |                       |             |           |           |                |
| Expt, target                                                            | 59                    | 0.91        | 0.83      | 1         | 286.53*        |
| Expt, near                                                              | 32                    | 0.68        | 0.56      | 0.79      | 96.03*         |
| Expt, far                                                               | 25                    | 0.37        | 0.24      | 0.49      | 16.81          |
| Active control, target                                                  | 12                    | 0.38        | 0.2       | 0.54      | 42.45*         |
| Active control, near                                                    | 14                    | 0.17        | 0.01      | 0.32      | 14.43          |
| Active control, far                                                     | 14                    | 0.17        | 0.01      | 0.33      | 4.87           |
| Passive control, target                                                 | 11                    | 0.13        | -0.06     | 0.33      | 8.2            |
| Passive control, near                                                   | 13                    | 0.15        | -0.02     | 0.32      | 4.04           |
| Passive control, far                                                    | 11                    | 0.14        | -0.05     | 0.32      | 3.58           |
| By age group (only studies that included both younger and older adults) |                       |             |           |           |                |
| Older                                                                   |                       |             |           |           |                |
| Expt, target                                                            | 28                    | 0.86        | 0.73      | 0.99      | 145.34*        |
| Expt, near                                                              | 9                     | 0.73        | 0.49      | 0.96      | 30.00*         |
| Expt, far                                                               | 4                     | 0.40        | 0.11      | 0.69      | 0.22           |
| Active control                                                          | 7                     | 0.34        | 0.10      | 0.58      | 0.45           |
| Passive control                                                         | 7                     | 0.08        | -0.19     | 0.35      | 0.55           |
| Younger                                                                 |                       |             |           |           |                |
| Expt, target                                                            | 28                    | 0.78        | 0.65      | 0.91      | 177.29*        |
| Expt, near                                                              | 9                     | 0.98        | 0.76      | 1.20      | 88.55*         |
| Expt, far                                                               | 4                     | 0.72        | 0.43      | 1.01      | 1.04           |
| Active control                                                          | 7                     | 0.33        | 0.09      | 0.57      | 6.15           |

|                                         |    |      |       |      |         |
|-----------------------------------------|----|------|-------|------|---------|
| Passive control                         | 7  | 0.28 | 0.00  | 0.56 | 1.64    |
| By training type                        |    |      |       |      |         |
| Executive function                      |    |      |       |      |         |
| Expt, target                            | 47 | 0.98 | 0.88  | 1.08 | 353.97* |
| Expt, near                              | 19 | 0.78 | 0.62  | 0.94 | 65.9*   |
| Expt, far                               | 13 | 0.26 | 0.10  | 0.44 | 1.42    |
| Active control                          | 10 | 0.33 | 0.14  | 0.52 | 2.74    |
| Passive control                         | 12 | 0.16 | -0.04 | 0.35 | 2.81    |
| Working memory                          |    |      |       |      |         |
| Expt, target                            | 12 | 1.06 | 0.88  | 1.24 | 28.06*  |
| Expt, near                              | 13 | 0.57 | 0.41  | 0.74 | 26.9*8  |
| Expt, far                               | 12 | 0.49 | 0.31  | 0.67 | 12.35   |
| Active control                          | 9  | 0.13 | -0.05 | 0.32 | 2.50    |
| Passive control                         | 5  | 0.14 | -0.08 | 0.36 | 0.35    |
| By far transfer measure                 |    |      |       |      |         |
| EF/attention                            | 14 | 0.20 | 0.04  | 0.36 | 10.89   |
| Gf                                      | 14 | 0.35 | 0.18  | 0.52 | 20.25   |
| episodic mem                            | 11 | 0.40 | 0.18  | 0.55 | 3.49    |
| WM/STM                                  | 5  | 0.41 | 0.15  | 0.66 | 1.27    |
| Speed                                   | 10 | 0.43 | 0.23  | 0.64 | 7.22    |
| Other                                   | 10 | 0.42 | 0.21  | 0.63 | 11.70   |
| Cross-sectional comparisons at posttest |    |      |       |      |         |
| Versus passive control                  |    |      |       |      |         |
| Target                                  | 10 | 1.20 | 0.97  | 1.43 | 24.29*  |
| Near transfer                           | 13 | 0.48 | 0.29  | 0.67 | 13.59   |
| Far transfer                            | 10 | 0.36 | 0.15  | 0.57 | 10.83   |
| Versus active control                   |    |      |       |      |         |
| Target                                  | 11 | 1.20 | 1.01  | 1.39 | 30.65   |
| Near transfer                           | 15 | 0.56 | 0.41  | 0.72 | 107.41  |
| Far transfer                            | 13 | 0.34 | 0.17  | 0.51 | 39.48   |



*Note:* Asterisks denote significant heterogeneity of the effect size.
